# Supplementary material
Source: publisher figshare collection journal article supplement (https://acs.figshare.com/ndownloader/files/3828361)
Supplement: Supplementary file 1 [file 3828361]

data_General
_audit_creation_date                    2014-09-17
_audit_creation_method                 'by CrystalStructure 4.0'
_audit_update_record                    ?

#==============================================================================
# PROCESSING SUMMARY (IUCr Office Use Only)

_journal_date_recd_electronic           ?
_journal_date_from_coeditor             ?
_journal_date_accepted                  ?
_journal_coeditor_code                  ?

#==============================================================================
# SUBMISSION DETAILS

_publ_contact_author_name              'ENTER NAME'
_publ_contact_author_email             'ENTER EMAIL ADDRESS'
_publ_contact_author_fax               'ENTER FAX NUMBER'
_publ_contact_author_phone             'ENTER PHONE NUMBER'
_publ_contact_letter
;
    ENTER TEXT OF LETTER
;
_publ_requested_journal                'ENTER JOURNAL NAME HERE'
_publ_requested_category               'CHOOSE FI FM FO CI CM CO or AD'
_publ_requested_coeditor_name           ?

#==============================================================================
# TITLE AND AUTHOR LIST

_publ_section_title
;
    ENTER SECTION TITLE
;
_publ_section_title_footnote
;
    ENTER FOOTNOTE TO TITLE OF PAPER
;
loop_
_publ_author_name
_publ_author_footnote
_publ_author_address
' FIRST AUTHORS NAME '
;
  FIRST AUTHORS FOOTNOTES
;
;
  FIRST AUTHORS ADDRESS
;
_publ_section_synopsis
;
    ENTER SYNOPSIS
;

#==============================================================================
# TEXT

_publ_section_abstract
;
    ENTER ABSTRACT
;
_publ_section_comment
;
    ENTER TEXT
;
_publ_section_references
;
    ENTER OTHER REFERENCES

    Rigaku (2010). CrystalStructure. Version 4.0. 
    Rigaku Corporation, Tokyo, Japan.

    M.C. Burla, R. Caliandro, M. Camalli, B. Carrozzini, 
    G.L. Cascarano, L. De Caro, C. Giacovazzo, G. Polidori, 
    D. Siliqi, R. Spagna (2007) 
    SIR2008

    Sheldrick, G.M. (2008), Acta Cryst. A64, 112-122.

    Rigaku (1999). NUMABS. 
    Rigaku Corporation, Tokyo, Japan.

;
_publ_section_figure_captions
;
    ENTER FIGURE CAPTIONS
;
_publ_section_exptl_prep
;
    ENTER COMPOUND PREPARATION DETAILS
;
_publ_section_exptl_refinement
;
    ENTER SPECIAL DETAILS OF THE REFINEMENT
;

#==============================================================================
data_140916TT3

#==============================================================================
# CHEMICAL DATA

_chemical_formula_sum                  'C30 H22 S'
_chemical_formula_moiety               'C30 H22 S'
_chemical_formula_weight                414.56
_chemical_melting_point                 ?

#==============================================================================
# CRYSTAL DATA
_symmetry_cell_setting                  monoclinic
_symmetry_space_group_name_H-M         'P 1 21/n 1'
_symmetry_space_group_name_Hall        '-P 2yn'
_symmetry_Int_Tables_number             14
loop_
_symmetry_equiv_pos_site_id
_symmetry_equiv_pos_as_xyz
1   '+X,+Y,+Z'
2   '1/2-X,1/2+Y,1/2-Z'
3   '-X,-Y,-Z'
4   '1/2+X,1/2-Y,1/2+Z'
#------------------------------------------------------------------------------
_cell_length_a                          12.0374(5)
_cell_length_b                          12.5139(4)
_cell_length_c                          14.3361(5)
_cell_angle_alpha                       90.0000
_cell_angle_beta                        99.098(3)
_cell_angle_gamma                       90.0000
_cell_volume                            2132.35(13)
_cell_formula_units_Z                   4
_cell_measurement_reflns_used           6686
_cell_measurement_theta_min             3.12
_cell_measurement_theta_max             68.21
_cell_measurement_temperature           100
#------------------------------------------------------------------------------
_exptl_crystal_description              block
_exptl_crystal_colour                   orange
_exptl_crystal_size_max                 0.100
_exptl_crystal_size_mid                 0.100
_exptl_crystal_size_min                 0.100
_exptl_crystal_density_diffrn           1.291
_exptl_crystal_density_meas             ?
_exptl_crystal_density_method          'not measured'
_exptl_crystal_F_000                    872.00
_exptl_absorpt_coefficient_mu           1.441
_exptl_absorpt_correction_type          numerical
_exptl_absorpt_process_details         'NUMABS (Rigaku, 1999)'
_exptl_absorpt_correction_T_min         0.837
_exptl_absorpt_correction_T_max         0.866

#==============================================================================
# EXPERIMENTAL DATA

_diffrn_ambient_temperature             100
_diffrn_radiation_type                 'Cu K\a'
_diffrn_radiation_wavelength            1.54187
_diffrn_measurement_device_type        'Rigaku R-AXIS RAPID'
_diffrn_measurement_method              \w
_diffrn_detector_area_resol_mean        10.000
_diffrn_reflns_number                   23612
_diffrn_reflns_av_R_equivalents         0.0661
_diffrn_reflns_theta_max                68.23
_diffrn_reflns_theta_full               68.23
_diffrn_measured_fraction_theta_max     0.987
_diffrn_measured_fraction_theta_full    0.987
_diffrn_reflns_limit_h_min             -13
_diffrn_reflns_limit_h_max              13
_diffrn_reflns_limit_k_min             -15
_diffrn_reflns_limit_k_max              14
_diffrn_reflns_limit_l_min             -17
_diffrn_reflns_limit_l_max              16
_diffrn_standards_number                0
_diffrn_standards_interval_count        .
_diffrn_standards_decay_%               ?

#==============================================================================
# REFINEMENT DATA

_refine_special_details
;
    Refinement was performed using all reflections. The weighted 
    R-factor (wR) and goodness of fit (S) are based on F^2^.
    R-factor (gt) are based on F. The threshold expression of
    F^2^ > 2.0 sigma(F^2^) is used only for calculating R-factor (gt).
;
_reflns_number_total                    3852
_reflns_number_gt                       3489
_reflns_threshold_expression            F^2^>2.0\s(F^2^)
_refine_ls_structure_factor_coef        Fsqd
_refine_ls_R_factor_gt                  0.0433
_refine_ls_wR_factor_ref                0.1104
_refine_ls_number_restraints            0
_refine_ls_hydrogen_treatment           constr
_refine_ls_number_reflns                3852
_refine_ls_number_parameters            280
_refine_ls_goodness_of_fit_ref          1.077
_refine_ls_weighting_scheme             calc
_refine_ls_weighting_details
           'w = 1/[\s^2^(Fo^2^)+(0.0493P)^2^+1.2156P] where P=(Fo^2^+2Fc^2^)/3'
_atom_sites_solution_hydrogens          geom
_atom_sites_solution_primary            direct
_atom_sites_solution_secondary          difmap
_refine_ls_shift/su_max                 0.000
_refine_diff_density_max                0.250
_refine_diff_density_min               -0.440
_refine_ls_extinction_method            none
_refine_ls_extinction_coef              ?

loop_
_atom_type_symbol
_atom_type_description
_atom_type_scat_dispersion_real
_atom_type_scat_dispersion_imag
_atom_type_scat_source
  'C' 'C'  0.0181 0.0091 
;
International Tables for Crystallography
(1992, Vol. C, Tables 4.2.6.8 and 6.1.1.4)
;
  'H' 'H'  0.0000 0.0000 
;
International Tables for Crystallography
(1992, Vol. C, Table 6.1.1.4)
;
  'S' 'S'  0.3331 0.5567 
;
International Tables for Crystallography
(1992, Vol. C, Tables 4.2.6.8 and 6.1.1.4)
;

#==============================================================================
# ATOMIC COORDINATES AND THERMAL PARAMETERS

loop_
_atom_site_label
_atom_site_type_symbol
_atom_site_fract_x
_atom_site_fract_y
_atom_site_fract_z
_atom_site_U_iso_or_equiv
_atom_site_adp_type
_atom_site_occupancy
_atom_site_symmetry_multiplicity
_atom_site_calc_flag
_atom_site_refinement_flags
_atom_site_disorder_assembly
_atom_site_disorder_group
 S1 S 0.47374(4) 0.17278(3) 0.90427(3) 0.01935(14) Uani 1.0 4 d . . .
 C1 C 0.46149(15) -0.00806(14) 0.81257(12) 0.0196(4) Uani 1.0 4 d . . .
 C2 C 0.10062(15) 0.03783(14) 0.80607(12) 0.0196(4) Uani 1.0 4 d . . .
 C3 C 0.35757(15) 0.03223(14) 0.79471(12) 0.0195(4) Uani 1.0 4 d . . .
 C4 C 0.11929(16) 0.32350(14) 0.89282(13) 0.0212(4) Uani 1.0 4 d . . .
 C5 C 0.22661(15) 0.29490(14) 0.87365(12) 0.0183(4) Uani 1.0 4 d . . .
 C6 C 0.72664(17) -0.16287(15) 0.70923(13) 0.0241(4) Uani 1.0 4 d . . .
 C7 C 0.71465(16) 0.16432(14) 1.02738(13) 0.0205(4) Uani 1.0 4 d . . .
 C8 C 0.34184(15) 0.13417(14) 0.83848(12) 0.0176(4) Uani 1.0 4 d . . .
 C9 C 0.69779(14) -0.06339(13) 0.84832(12) 0.0172(4) Uani 1.0 4 d . . .
 C10 C 0.74625(15) -0.14751(14) 0.90411(13) 0.0203(4) Uani 1.0 4 d . . .
 C11 C 0.85467(15) 0.09046(13) 0.94434(12) 0.0190(4) Uani 1.0 4 d . . .
 C12 C 0.65587(15) 0.03385(13) 0.89339(12) 0.0171(4) Uani 1.0 4 d . . .
 C13 C 0.74108(15) 0.09700(13) 0.95573(12) 0.0175(4) Uani 1.0 4 d . . .
 C14 C 0.24230(15) 0.18881(13) 0.83201(12) 0.0176(4) Uani 1.0 4 d . . .
 C15 C 0.79758(16) 0.22324(14) 1.08330(13) 0.0236(4) Uani 1.0 4 d . . .
 C16 C 0.68934(15) -0.07236(14) 0.74995(13) 0.0208(4) Uani 1.0 4 d . . .
 C17 C 0.54377(15) 0.05669(13) 0.87175(12) 0.0178(4) Uani 1.0 4 d . . .
 C18 C 0.13882(15) 0.13677(14) 0.77934(12) 0.0179(4) Uani 1.0 4 d . . .
 C19 C 0.07658(15) 0.18878(14) 0.70174(13) 0.0206(4) Uani 1.0 4 d . . .
 C20 C 0.31336(16) 0.36974(14) 0.89573(13) 0.0217(4) Uani 1.0 4 d . . .
 C21 C -0.01829(16) 0.14185(16) 0.65071(13) 0.0249(5) Uani 1.0 4 d . . .
 C22 C 0.77487(16) -0.24644(14) 0.76610(13) 0.0233(4) Uani 1.0 4 d . . .
 C23 C 0.78424(15) -0.23855(14) 0.86347(13) 0.0210(4) Uani 1.0 4 d . . .
 C24 C 0.18865(17) 0.49209(14) 0.95835(13) 0.0259(5) Uani 1.0 4 d . . .
 C25 C 0.00498(16) -0.00890(15) 0.75558(13) 0.0229(4) Uani 1.0 4 d . . .
 C26 C 0.93725(16) 0.14834(14) 1.00096(13) 0.0222(4) Uani 1.0 4 d . . .
 C27 C 0.29468(17) 0.46688(14) 0.93771(13) 0.0251(5) Uani 1.0 4 d . . .
 C28 C 0.10107(17) 0.42008(15) 0.93463(13) 0.0253(5) Uani 1.0 4 d . . .
 C29 C 0.90854(16) 0.21606(14) 1.06995(14) 0.0237(4) Uani 1.0 4 d . . .
 C30 C -0.05446(16) 0.04261(16) 0.67800(13) 0.0254(5) Uani 1.0 4 d . . .
 H1 H 0.4798 -0.0736 0.7885 0.0236 Uiso 1.0 4 calc R . .
 H2 H 0.1397 0.0027 0.8584 0.0235 Uiso 1.0 4 calc R . .
 H3 H 0.2991 -0.0029 0.7566 0.0234 Uiso 1.0 4 calc R . .
 H4 H 0.0595 0.2764 0.8770 0.0254 Uiso 1.0 4 calc R . .
 H6 H 0.7196 -0.1681 0.6439 0.0289 Uiso 1.0 4 calc R . .
 H7 H 0.6404 0.1696 1.0376 0.0246 Uiso 1.0 4 calc R . .
 H10 H 0.7533 -0.1427 0.9695 0.0243 Uiso 1.0 4 calc R . .
 H11 H 0.8749 0.0462 0.8977 0.0228 Uiso 1.0 4 calc R . .
 H15 H 0.7783 0.2679 1.1301 0.0284 Uiso 1.0 4 calc R . .
 H16 H 0.6582 -0.0166 0.7116 0.0250 Uiso 1.0 4 calc R . .
 H19 H 0.0992 0.2559 0.6842 0.0247 Uiso 1.0 4 calc R . .
 H20 H 0.3846 0.3542 0.8821 0.0261 Uiso 1.0 4 calc R . .
 H21 H -0.0577 0.1766 0.5983 0.0299 Uiso 1.0 4 calc R . .
 H22 H 0.8006 -0.3072 0.7388 0.0280 Uiso 1.0 4 calc R . .
 H23 H 0.8160 -0.2942 0.9016 0.0252 Uiso 1.0 4 calc R . .
 H24 H 0.1766 0.5564 0.9877 0.0310 Uiso 1.0 4 calc R . .
 H25 H -0.0192 -0.0751 0.7740 0.0274 Uiso 1.0 4 calc R . .
 H26 H 1.0120 0.1418 0.9927 0.0266 Uiso 1.0 4 calc R . .
 H27 H 0.3535 0.5153 0.9521 0.0301 Uiso 1.0 4 calc R . .
 H28 H 0.0296 0.4370 0.9470 0.0304 Uiso 1.0 4 calc R . .
 H29 H 0.9636 0.2564 1.1070 0.0284 Uiso 1.0 4 calc R . .
 H30 H -0.1184 0.0111 0.6442 0.0305 Uiso 1.0 4 calc R . .


loop_
_atom_site_aniso_label
_atom_site_aniso_U_11
_atom_site_aniso_U_22
_atom_site_aniso_U_33
_atom_site_aniso_U_12
_atom_site_aniso_U_13
_atom_site_aniso_U_23
 S1 0.0165(3) 0.0168(3) 0.0236(3) 0.00186(16) -0.00034(17) -0.00492(16)
 C1 0.0197(10) 0.0170(9) 0.0223(9) -0.0013(7) 0.0033(7) -0.0040(7)
 C2 0.0200(10) 0.0206(9) 0.0185(9) 0.0030(7) 0.0036(7) 0.0008(7)
 C3 0.0177(10) 0.0205(9) 0.0200(9) -0.0024(7) 0.0019(7) -0.0029(7)
 C4 0.0237(11) 0.0202(9) 0.0195(9) 0.0015(8) 0.0031(8) 0.0031(7)
 C5 0.0230(10) 0.0178(9) 0.0139(9) 0.0028(7) 0.0018(7) 0.0041(7)
 C6 0.0284(11) 0.0249(10) 0.0191(10) -0.0025(8) 0.0044(8) -0.0041(8)
 C7 0.0170(10) 0.0220(9) 0.0221(10) 0.0032(7) 0.0017(7) -0.0007(7)
 C8 0.0174(10) 0.0187(9) 0.0161(9) -0.0018(7) 0.0011(7) -0.0002(7)
 C9 0.0133(9) 0.0174(9) 0.0207(9) -0.0022(7) 0.0023(7) -0.0013(7)
 C10 0.0197(10) 0.0210(9) 0.0195(9) -0.0016(7) 0.0010(7) -0.0010(7)
 C11 0.0177(10) 0.0180(9) 0.0214(9) 0.0021(7) 0.0038(7) 0.0008(7)
 C12 0.0184(10) 0.0159(9) 0.0172(9) -0.0004(7) 0.0032(7) 0.0014(7)
 C13 0.0208(10) 0.0138(8) 0.0176(9) 0.0014(7) 0.0018(7) 0.0030(7)
 C14 0.0190(10) 0.0179(9) 0.0161(9) 0.0005(7) 0.0034(7) 0.0020(7)
 C15 0.0238(11) 0.0221(10) 0.0244(10) 0.0018(8) 0.0017(8) -0.0044(8)
 C16 0.0220(10) 0.0191(9) 0.0210(9) 0.0014(7) 0.0021(8) 0.0020(7)
 C17 0.0194(10) 0.0153(8) 0.0188(9) 0.0010(7) 0.0034(7) -0.0010(7)
 C18 0.0161(10) 0.0202(9) 0.0180(9) 0.0037(7) 0.0046(7) -0.0019(7)
 C19 0.0195(10) 0.0205(9) 0.0219(10) 0.0041(7) 0.0040(8) 0.0025(7)
 C20 0.0235(11) 0.0190(9) 0.0217(10) 0.0008(8) 0.0005(8) 0.0040(7)
 C21 0.0181(10) 0.0342(11) 0.0214(10) 0.0062(8) -0.0001(8) 0.0015(8)
 C22 0.0229(11) 0.0182(9) 0.0291(11) 0.0012(8) 0.0049(8) -0.0058(8)
 C23 0.0186(10) 0.0174(9) 0.0258(10) 0.0006(7) -0.0003(8) 0.0013(7)
 C24 0.0388(12) 0.0170(9) 0.0211(10) 0.0069(8) 0.0026(9) -0.0010(7)
 C25 0.0202(10) 0.0220(9) 0.0274(10) -0.0027(8) 0.0072(8) -0.0020(8)
 C26 0.0177(10) 0.0213(9) 0.0277(10) 0.0004(7) 0.0042(8) 0.0050(8)
 C27 0.0319(12) 0.0172(9) 0.0233(10) -0.0011(8) -0.0041(8) 0.0029(7)
 C28 0.0307(12) 0.0248(10) 0.0218(10) 0.0081(8) 0.0077(8) 0.0018(8)
 C29 0.0222(11) 0.0194(9) 0.0276(10) -0.0039(8) -0.0018(8) 0.0008(8)
 C30 0.0164(10) 0.0352(11) 0.0240(10) -0.0019(8) 0.0014(8) -0.0046(8)

#==============================================================================
_computing_data_collection             'RAPID AUTO (Rigaku, ????)'
_computing_cell_refinement             'RAPID AUTO'
_computing_data_reduction              'RAPID AUTO'
_computing_structure_solution          'Il Milione (Burla, et al., 2007)'
_computing_structure_refinement        'SHELXL97 (Sheldrick, 2008)'
_computing_publication_material        'CrystalStructure 4.0 (Rigaku, 2010)'
_computing_molecular_graphics          'CrystalStructure 4.0'


#==============================================================================
# MOLECULAR GEOMETRY

_geom_special_details
;
    ENTER SPECIAL DETAILS OF THE MOLECULAR GEOMETRY
;

loop_
_geom_bond_atom_site_label_1
_geom_bond_atom_site_label_2
_geom_bond_distance
_geom_bond_publ_flag
_geom_bond_site_symmetry_1
_geom_bond_site_symmetry_2
S1 C8 1.7805(18) yes . .
S1 C17 1.7784(18) yes . .
C1 C3 1.335(3) yes . .
C1 C17 1.446(3) yes . .
C2 C18 1.395(3) yes . .
C2 C25 1.388(3) yes . .
C3 C8 1.447(3) yes . .
C4 C5 1.409(3) yes . .
C4 C28 1.382(3) yes . .
C5 C14 1.480(3) yes . .
C5 C20 1.401(3) yes . .
C6 C16 1.381(3) yes . .
C6 C22 1.395(3) yes . .
C7 C13 1.403(3) yes . .
C7 C15 1.389(3) yes . .
C8 C14 1.370(3) yes . .
C9 C10 1.393(3) yes . .
C9 C12 1.502(3) yes . .
C9 C16 1.402(3) yes . .
C10 C23 1.390(3) yes . .
C11 C13 1.405(3) yes . .
C11 C26 1.384(3) yes . .
C12 C13 1.478(3) yes . .
C12 C17 1.366(3) yes . .
C14 C18 1.499(3) yes . .
C15 C29 1.382(3) yes . .
C18 C19 1.400(3) yes . .
C19 C21 1.386(3) yes . .
C20 C27 1.390(3) yes . .
C21 C30 1.392(3) yes . .
C22 C23 1.386(3) yes . .
C24 C27 1.391(3) yes . .
C24 C28 1.388(3) yes . .
C25 C30 1.383(3) yes . .
C26 C29 1.387(3) yes . .

loop_
_geom_angle_atom_site_label_1
_geom_angle_atom_site_label_2
_geom_angle_atom_site_label_3
_geom_angle
_geom_angle_publ_flag
_geom_angle_site_symmetry_1
_geom_angle_site_symmetry_2
_geom_angle_site_symmetry_3
C8 S1 C17 93.41(8) yes . . .
C3 C1 C17 115.77(16) yes . . .
C18 C2 C25 120.84(16) yes . . .
C1 C3 C8 115.62(16) yes . . .
C5 C4 C28 121.34(17) yes . . .
C4 C5 C14 119.08(16) yes . . .
C4 C5 C20 117.37(17) yes . . .
C14 C5 C20 123.55(17) yes . . .
C16 C6 C22 120.05(17) yes . . .
C13 C7 C15 121.04(18) yes . . .
S1 C8 C3 107.58(13) yes . . .
S1 C8 C14 126.69(14) yes . . .
C3 C8 C14 125.70(16) yes . . .
C10 C9 C12 120.26(16) yes . . .
C10 C9 C16 118.30(16) yes . . .
C12 C9 C16 121.44(15) yes . . .
C9 C10 C23 120.97(17) yes . . .
C13 C11 C26 121.55(17) yes . . .
C9 C12 C13 116.42(15) yes . . .
C9 C12 C17 117.31(15) yes . . .
C13 C12 C17 126.26(16) yes . . .
C7 C13 C11 117.23(16) yes . . .
C7 C13 C12 123.19(17) yes . . .
C11 C13 C12 119.58(16) yes . . .
C5 C14 C8 125.91(16) yes . . .
C5 C14 C18 116.35(15) yes . . .
C8 C14 C18 117.73(15) yes . . .
C7 C15 C29 120.51(18) yes . . .
C6 C16 C9 120.92(16) yes . . .
S1 C17 C1 107.60(13) yes . . .
S1 C17 C12 127.12(13) yes . . .
C1 C17 C12 125.19(16) yes . . .
C2 C18 C14 122.05(15) yes . . .
C2 C18 C19 118.21(16) yes . . .
C14 C18 C19 119.73(16) yes . . .
C18 C19 C21 121.03(17) yes . . .
C5 C20 C27 121.09(19) yes . . .
C19 C21 C30 119.86(17) yes . . .
C6 C22 C23 119.69(17) yes . . .
C10 C23 C22 120.06(17) yes . . .
C27 C24 C28 119.18(17) yes . . .
C2 C25 C30 120.25(18) yes . . .
C11 C26 C29 120.07(18) yes . . .
C20 C27 C24 120.46(18) yes . . .
C4 C28 C24 120.51(19) yes . . .
C15 C29 C26 119.59(17) yes . . .
C21 C30 C25 119.78(17) yes . . .


#==============================================================================

#==============================================================================
# Additional structures and associated data_? identifiers
# should be added at this point if there is more than one 
# structure analysis in the CIF.

#==============================================================================
#     End of CIF
#==============================================================================
